# Supplementary material
Source: Research Square preprint supplement (doi:10.21203/rs.3.rs-8422977/v1)
Supplement: Supplementary file 1 [file db99750cdfac9a6850d5aba0.docx]

**Survey translated from Danish to English**

Contents

[Survey start page 3](#_Toc219978868)

[Introduction 3](#_Toc219978869)

[Background 3](#_Toc219978870)

[Questionnaire 4](#_Toc219978871)

[Screening questions 4](#_Toc219978872)

[Questions 4](#_Toc219978873)

# Survey start page

## Introduction

This study aims to investigate the organizational impact of implementing disposable gastroscopy in a gastrointestinal surgery department. The purpose is to compare the perceived organizational effects— from a nursing perspective—of a setup that uses 100% reusable endoscopes with a hybrid setup where both reusable and disposable endoscopes are available. Your department is well suited for this assessment, as you have experience working under both conditions.

Your participation in this study is entirely voluntary. You have the right to withdraw from the questionnaire at any time, without providing any explanation, and without any consequences. Choosing to participate or withdraw will not affect you in any way.

All responses are anonymous, and no personal identifiable or sensitive data will be collected. Your answers will be treated as strictly confidential. Data will be stored securely, coded, and used only for research purposes. Results will be reported exclusively in aggregated form, ensuring that no individual can be identified. Only fully completed questionnaires will be included in the analysis.

The aggregated findings may be presented at conferences and/or published in peer‑reviewed journals or white papers.

In the following questionnaire, you are asked to respond based on your experience with:

- a 100% reusable endoscopy setup (the setup that you had 2021 and earlier), and
- a hybrid setup (the setup you had since 2022, where both reusable and disposable endoscopes were in use).

## Background

“Organizational Impact” is a collective term for parameters that, from an organizational perspective, describe the impact that the implementation of new technology has.

When new medical equipment is implemented, it will influence the organization. It is therefore important to be able to define, investigate, and thereby explain the organizational impact of the implementation. This is done by examining relevant organizational effects within the 12 defined parameters below:

1. Work processes or production
2. Patient pathways
3. Patient flow
4. Type and level of patient and family involvement
5. Training requirements and skills needed by healthcare professionals
6. Collaboration and communication methods
7. Attention and monitoring methods
8. Working conditions and safety
9. Accessibility
10. Budget allocation
11. Infrastructure
12. Logistics

Previously, decision‑making processes were primarily based on clinical and economic considerations, but organizational impact has gradually also become a central aspect of such processes. In addition, an assessment of organizational impact can highlight which advantages and barriers may be expected when implementing a new technology.

Thank you for your participation.

# Questionnaire

## Screening questions

Have you participated in the management of both single-use and reusable scopes?

How many years of experience do you have as a nurse?

How many years of experience do you have as an OR nurse?

## Questions

How does wear and tear (repairs, various failures, etc.) of reusable scopes affect your work?

How often is your workflow affected by whether the reusable scope is available?

To what extent does it affect your workflow when a reusable scope breaks?

The possibility of using a single-use scope improves my workflow and frees up important time for other tasks.

The possibility of using a single-use scope impacts my workflow, as I have to deal with both reusable and single-use scopes.

How much of a burden is the preparation and maintenance of the operating room when using reusable scopes?

How much of a burden is the preparation and maintenance of the operating room when using single-use scopes?

How much of a burden is the maintenance involved in *sorteringen[[1]](#footnote-1)* (restocking, cleaning, etc.) when using reusable scopes?

Overall, how much of a burden is the maintenance involved in *sorteringen1* (restocking, cleaning, etc.) when using single-use scopes?

How much of a burden is the restocking and maintenance of the *sorteringen1*, depot, and cupboards for reusable scopes?

How much of a burden is the restocking and maintenance of the *sorteringen1*, depot, and cupboards for single-use scopes?

From a nursing perspective, how difficult was it to implement single-use scopes in your department?

From a nursing perspective, how much resistance was there to implementing single-use scopes in your department?

How much of a burden is it to transport the scope and necessary equipment during a procedure when using reusable scopes?

How much of a burden is it to transport the scope and necessary equipment during a procedure when using a single-use scope?

How does a hybrid setup affect the number of patients who can be seen daily? (Hybrid setup = department has both reusable and single-use scopes)

How does a setup with only reusable gastroscopes affect the number of patients who can be seen daily?

How does a hybrid setup affect on-call workload?

How does a setup with only reusable gastroscopes affect on-call workload?

Does the patient experience delays caused by the scope in a setup with only reusable scopes?

Does the patient experience delays caused by the scope in a hybrid setup?

If you were a new OR nurse, how much training would it require before mastering procedures related to reusable scopes (preparation, setup, cleaning, storage, etc.)?

If you were a new OR nurse, how much training would it require before mastering procedures related to single-use scopes (preparation, setup, cleaning, storage, etc.)?

How time‑consuming is the training in handling microbiological sampling of reusable scopes (water samples)?

How much communication/coordination is needed to ensure that a reusable scope is clean and ready for use?

How much communication/coordination is needed to ensure that a single-use scope is ready for use?

How much communication and collaboration are needed internally in the department to ensure clean, available reusable scopes?

How much communication and coordination are needed internally in the department to ensure available single-use scopes?

How much communication and collaboration between nurses are required to clean a reusable scope so that it is ready for the next patient?

How much communication and collaboration between nurses are needed after the procedure to ensure that a new single-use scope is ready for the next patient?

How often do you experience having to report/handle a broken reusable scope?

How often do you experience having to handle a broken single-use scope?

How easy/difficult is it to report and handle repairs of reusable scopes?

How easy/difficult is it to handle it when a single-use scope breaks?

How do you experience the amount of documentation related to procedures with reusable scopes?

How do you experience the amount of documentation related to procedures with single-use scopes?

How much attention/carefulness is required for the cleaning procedure and storage of reusable scopes?

How much attention/carefulness is required for the cleaning procedure and storage of single-use scopes?

How would your work be affected if the department only had reusable scopes?

How does a hybrid setup affect your work?

How would it affect your on-call work if you only had the option of using a reusable scope?

How would it affect your on-call work if you only had the option of using a single-use scope?

How does it impact your working environment when you must handle chemicals/enzyme soap for cleaning reusable scopes?

How does your work environment change when you do not have to handle chemicals/enzyme soap when using a single‑use scope?

When you transport or clean reusable scopes, how physically exposed do you feel in terms of repetitive work and working posture?

When you transport or dispose of single-use scopes, how physically exposed do you feel in terms of repetitive work and working posture?

Does the availability of single-use scopes allow you to perform your work with greater calm and overview?

Is your job satisfaction affected by the department having single-use scopes?

My work has become more attractive after the introduction of a hybrid setup.

The implementation of single-use scopes has affected my job satisfaction and retention in my job.

Previously, when your department only had reusable scopes: How did the availability of a clean and ready gastroscope affect your work as a nurse?

Now, when your department has both reusable and single‑use scopes: How does the availability of a clean and ready gastroscope affect your work as a nurse?

How much logistics is required for cleaning reusable scopes?

How much logistics is required to ensure that there are clean reusable scopes ready for all operations?

How much logistics is required to ensure that there are single‑use scopes ready for operations?

How big is the logistical burden associated with maintenance and repair of reusable scopes?

How big is the logistical burden associated with maintenance and repair of single‑use scopes?

How big is the logistical burden associated with purchasing and restocking supplies for cleaning reusable scopes?

1. The nurses at the department call the room “sorteringen” [↑](#footnote-ref-1)
